# Supplementary material for: Singularity response reveals entrainment properties in mammalian circadian clock
Source: PubMed Central journal article supplement (PMC10192398; doi:10.1038/s41467-023-38392-x), 2023-05-17
Supplement: 41467_2023_38392_MOESM3_ESM.pdf [file 41467_2023_38392_MOESM3_ESM.pdf]

## Reporting Summary

Nature Portfolio wishes to improve the reproducibility of the work that we publish. This form provides structure for consistency and transparency in reporting. For further information on Nature Portfolio policies, see our [Editorial Policies](#) and the [Editorial Policy Checklist](#).

### Statistics

For all statistical analyses, confirm that the following items are present in the figure legend, table legend, main text, or Methods section.

n/a | Confirmed

- The exact sample size ( $n$ ) for each experimental group/condition, given as a discrete number and unit of measurement
- A statement on whether measurements were taken from distinct samples or whether the same sample was measured repeatedly
- The statistical test(s) used AND whether they are one- or two-sided  
*Only common tests should be described solely by name; describe more complex techniques in the Methods section.*
- A description of all covariates tested
- A description of any assumptions or corrections, such as tests of normality and adjustment for multiple comparisons
- A full description of the statistical parameters including central tendency (e.g. means) or other basic estimates (e.g. regression coefficient) AND variation (e.g. standard deviation) or associated estimates of uncertainty (e.g. confidence intervals)
- For null hypothesis testing, the test statistic (e.g.  $F$ ,  $t$ ,  $r$ ) with confidence intervals, effect sizes, degrees of freedom and  $P$  value noted  
*Give  $P$  values as exact values whenever suitable.*
- For Bayesian analysis, information on the choice of priors and Markov chain Monte Carlo settings
- For hierarchical and complex designs, identification of the appropriate level for tests and full reporting of outcomes
- Estimates of effect sizes (e.g. Cohen's  $d$ , Pearson's  $r$ ), indicating how they were calculated

*Our web collection on [statistics for biologists](#) contains articles on many of the points above.*

### Software and code

Policy information about [availability of computer code](#)

|                 |                                                                                                                                                                                                                                                                                                                                                                                                                                                                                            |
|-----------------|--------------------------------------------------------------------------------------------------------------------------------------------------------------------------------------------------------------------------------------------------------------------------------------------------------------------------------------------------------------------------------------------------------------------------------------------------------------------------------------------|
| Data collection | We used the software attached with the measurement device, Kronos HT (ATTO, Japan), for the bioluminescence measurements.                                                                                                                                                                                                                                                                                                                                                                  |
| Data analysis   | Python (version 3.9.5) with the library Imfit (version 1.0.3) was used for the calculation of phase and amplitude. R (version 4.1.1) was used for the statical tests. In the multiple comparison test, we used the R package "multcomp" (version 1.4.18) for Tukey–Kramer test, and "NSM3" (version 1.16) for Steel–Dwass test. We also used the R package "circular" (version 0.4.93) for the assessment of circular data. Procedures for other calculations are shown in the manuscript. |

For manuscripts utilizing custom algorithms or software that are central to the research but not yet described in published literature, software must be made available to editors and reviewers. We strongly encourage code deposition in a community repository (e.g. GitHub). See the Nature Portfolio [guidelines for submitting code & software](#) for further information.

## Data

Policy information about [availability of data](#)

All manuscripts must include a [data availability statement](#). This statement should provide the following information, where applicable:

- Accession codes, unique identifiers, or web links for publicly available datasets
- A description of any restrictions on data availability
- For clinical datasets or third party data, please ensure that the statement adheres to our [policy](#)

All data needed to evaluate the conclusions of this study are presented in the manuscript and/or Supplementary Information. Source data are provided with this manuscript. Additional relevant data and materials may be requested from the authors.

## Human research participants

Policy information about [studies involving human research participants and Sex and Gender in Research](#).

|                             |    |
|-----------------------------|----|
| Reporting on sex and gender | NA |
| Population characteristics  | NA |
| Recruitment                 | NA |
| Ethics oversight            | NA |

Note that full information on the approval of the study protocol must also be provided in the manuscript.

## Field-specific reporting

Please select the one below that is the best fit for your research. If you are not sure, read the appropriate sections before making your selection.

- Life sciences       Behavioural & social sciences       Ecological, evolutionary & environmental sciences

For a reference copy of the document with all sections, see [nature.com/documents/nr-reporting-summary-flat.pdf](https://www.nature.com/documents/nr-reporting-summary-flat.pdf)

## Life sciences study design

All studies must disclose on these points even when the disclosure is negative.

|                 |                                                                                                                                                                  |
|-----------------|------------------------------------------------------------------------------------------------------------------------------------------------------------------|
| Sample size     | No sample size calculation was performed, but the samples size is sufficient to show differences in responsiveness for each stimulus as shown in the manuscript. |
| Data exclusions | No data were excluded.                                                                                                                                           |
| Replication     | The experiments were performed at least two times to verify the reproducibility.                                                                                 |
| Randomization   | Cell culture plates and animals were randomly allocated into the experimental groups.                                                                            |
| Blinding        | Blinding was not relevant to our study because all bioluminescence measurements and analysis after the treatments were automated.                                |

## Reporting for specific materials, systems and methods

We require information from authors about some types of materials, experimental systems and methods used in many studies. Here, indicate whether each material, system or method listed is relevant to your study. If you are not sure if a list item applies to your research, read the appropriate section before selecting a response.

## Materials &amp; experimental systems

## Methods

|                                     |                                                                 |
|-------------------------------------|-----------------------------------------------------------------|
| n/a                                 | Included in the study                                           |
| <input checked="" type="checkbox"/> | <input type="checkbox"/> Antibodies                             |
| <input type="checkbox"/>            | <input checked="" type="checkbox"/> Eukaryotic cell lines       |
| <input checked="" type="checkbox"/> | <input type="checkbox"/> Palaeontology and archaeology          |
| <input type="checkbox"/>            | <input checked="" type="checkbox"/> Animals and other organisms |
| <input checked="" type="checkbox"/> | <input type="checkbox"/> Clinical data                          |
| <input checked="" type="checkbox"/> | <input type="checkbox"/> Dual use research of concern           |

|                                     |                                                 |
|-------------------------------------|-------------------------------------------------|
| n/a                                 | Included in the study                           |
| <input checked="" type="checkbox"/> | <input type="checkbox"/> ChIP-seq               |
| <input checked="" type="checkbox"/> | <input type="checkbox"/> Flow cytometry         |
| <input checked="" type="checkbox"/> | <input type="checkbox"/> MRI-based neuroimaging |

## Eukaryotic cell lines

Policy information about [cell lines and Sex and Gender in Research](#)

|                                                                   |                                                                                                                                                                                                                                             |
|-------------------------------------------------------------------|---------------------------------------------------------------------------------------------------------------------------------------------------------------------------------------------------------------------------------------------|
| Cell line source(s)                                               | PER2::LUC MEFs were established from PER2::LUC mice generated by Yoo et al. (Proc Natl Acad Sci U S A., 2004,101:5339-46). We used Rat-1 Bmal1-luc cells generated in the previous study (Kon et al., Nat. Cell Biol., 2008, 12:1463-1469). |
| Authentication                                                    | The cell lines were not authenticated.                                                                                                                                                                                                      |
| Mycoplasma contamination                                          | The cell lines were not tested for mycoplasma contamination.                                                                                                                                                                                |
| Commonly misidentified lines (See <a href="#">ICLAC</a> register) | No commonly misidentified cell lines were used.                                                                                                                                                                                             |

## Animals and other research organisms

Policy information about [studies involving animals](#); [ARRIVE guidelines](#) recommended for reporting animal research, and [Sex and Gender in Research](#)

|                         |                                                                                                                                                                                                                                                                                                                       |
|-------------------------|-----------------------------------------------------------------------------------------------------------------------------------------------------------------------------------------------------------------------------------------------------------------------------------------------------------------------|
| Laboratory animals      | Male C57BL/6J PER2::LUC mice aged 31-39 weeks were used. PER2::LUC mice originate from mice generated by Yoo et al. (Proc Natl Acad Sci U S A., 2004,101(15):5339-46). Animals were maintained under a 12:12h light/dark cycle at 23.5 ± 2.0 °C and 50.0 ± 10.0 % humidity. Food and water were available ad libitum. |
| Wild animals            | This study did not use wild animals.                                                                                                                                                                                                                                                                                  |
| Reporting on sex        | The findings in the animal experiments can apply to only male mice; sex difference was not considered.                                                                                                                                                                                                                |
| Field-collected samples | This study did not include samples collected from the field.                                                                                                                                                                                                                                                          |
| Ethics oversight        | All experiments involving animals were approved by the Animal Experiment and Use Committee of the University of Tsukuba and were therefore in accordance with NIH guidelines.                                                                                                                                         |

Note that full information on the approval of the study protocol must also be provided in the manuscript.
